# Supplementary material for: Class of 2020 in Poland: Students’ Mental Health during the COVID-19 Outbreak in an Academic Setting
Source: PubMed Central journal article supplement (PMC7999098; doi:10.3390/ijerph18062884), 2021-03-11
Supplement: ijerph-18-02884-s001.pdf [file ijerph-18-02884-s001.pdf]

**Table S1.** Gender differences in Global Health Questionnaire (GHQ) scores. SD—standard deviation.

|                          | Female ( <i>n</i> = 842) |       | Male ( <i>n</i> = 269) |       | <i>p</i> |
|--------------------------|--------------------------|-------|------------------------|-------|----------|
|                          | Mean                     | SD    | Mean                   | SD    |          |
| GHQ Somatic Symptoms     | 9.06                     | 4.72  | 7.81                   | 4.33  | 0.001    |
| GHQ Anxiety and Insomnia | 11.71                    | 5.39  | 10.43                  | 5.32  | 0.002    |
| GHQ Social Dysfunction   | 11.76                    | 4.51  | 11.86                  | 4.48  | 0.67     |
| GHQ Severe Depression    | 7.64                     | 5.86  | 6.70                   | 5.90  | 0.009    |
| GHQ Total                | 39.65                    | 17.40 | 36.32                  | 17.04 | 0.009    |

**Table S2.** Living place differences in Global Health Questionnaire (GHQ) scores. SD—standard deviation.

|                          | Big City > 100,000 ( <i>n</i> = 580) |       | Small City or Village < 100,000 ( <i>n</i> = 531) |       | <i>p</i> |
|--------------------------|--------------------------------------|-------|---------------------------------------------------|-------|----------|
|                          | Mean                                 | SD    | Mean                                              | SD    |          |
| GHQ Somatic Symptoms     | 8.46                                 | 4.64  | 9.08                                              | 4.65  | 0.021    |
| GHQ Anxiety and Insomnia | 10.82                                | 5.48  | 12.04                                             | 5.25  | 0.001    |
| GHQ Social Dysfunction   | 11.35                                | 4.51  | 12.26                                             | 4.45  | 0.001    |
| GHQ Severe Depression    | 7.21                                 | 5.86  | 7.63                                              | 5.91  | 0.2      |
| GHQ Total                | 37.32                                | 17.17 | 40.50                                             | 17.44 | 0.003    |

**Table S3.** Change of residence due to pandemic—impact on Global Health Questionnaire (GHQ) scores. SD—standard deviation.

|                          | No Change of Residence ( <i>n</i> = 471) |       | Moved to Family House ( <i>n</i> = 551) |       | <i>p</i> |
|--------------------------|------------------------------------------|-------|-----------------------------------------|-------|----------|
|                          | Mean                                     | SD    | Mean                                    | SD    |          |
| GHQ somatic symptoms     | 8.32                                     | 4.56  | 9.09                                    | 4.70  | 0.08     |
| GHQ Anxiety and Insomnia | 10.79                                    | 5.43  | 11.99                                   | 5.26  | 0.003    |
| GHQ Social Dysfunction   | 11.38                                    | 4.56  | 12.34                                   | 4.41  | 0.002    |
| GHQ Severe depression    | 7.06                                     | 5.85  | 7.75                                    | 5.86  | >0.05    |
| GHQ Total                | 37.04                                    | 17.26 | 40.66                                   | 17.19 | 0.005    |

**Table S4.** Relationship impact on Global Health Questionnaire (GHQ) scores. QR—quartile range, SD—standard deviation.

|                          | No Partner ( <i>n</i> = 528) |       | Has a Partner ( <i>n</i> = 558) |       | <i>p</i> |
|--------------------------|------------------------------|-------|---------------------------------|-------|----------|
|                          | Mean                         | SD    | Mean                            | SD    |          |
| GHQ somatic symptoms     | 8.67                         | 4.66  | 8.91                            | 4.63  | >0.05    |
| GHQ Anxiety and Insomnia | 11.31                        | 5.28  | 11.59                           | 5.46  | >0.05    |
| GHQ Social Dysfunction   | 12.14                        | 4.48  | 11.50                           | 4.47  | >0.05    |
| GHQ Severe depression    | 7.94                         | 6.06  | 7.07                            | 5.69  | 0.03     |
| GHQ Total                | 39.58                        | 17.20 | 38.53                           | 17.34 | >0.05    |

**Table S5.** Spearman's R correlation coefficients and testing *p* values for three online learning assessment criteria and Global Health Questionnaire (GHQ) scores.

|                          | Online Learning Value |                | Online Learning Organization |                | Online Learning Effectivity |                |
|--------------------------|-----------------------|----------------|------------------------------|----------------|-----------------------------|----------------|
|                          | Spearman R            | <i>p</i> value | Spearman R                   | <i>p</i> value | Spearman R                  | <i>p</i> value |
| GHQ somatic symptoms     | -0.19                 | <0.001         | -0.12                        | 0.002          | -0.2                        | <0.001         |
| GHQ Anxiety and Insomnia | -0.2                  | <0.001         | -0.13                        | 0.002          | -0.24                       | <0.001         |
| GHQ Social Dysfunction   | -0.27                 | <0.001         | -0.17                        | <0.001         | -0.36                       | <0.001         |
| GHQ Severe depression    | -0.2                  | <0.001         | -0.16                        | <0.001         | -0.22                       | <0.001         |
| GHQ Total                | -0.25                 | <0.001         | -0.17                        | <0.001         | -0.29                       | <0.001         |
